# Supplementary material
Source: Springer Nature journal article supplement (https://www.springermedizin.de/resource/supplementary/12998_2009_105_MOESM6_ESM.pdf/9623626)
Supplement: MOESM6 [file 9623626]

| Extremity Conditions                    | Intervention                                   | Evidence      |          |      |
|-----------------------------------------|------------------------------------------------|---------------|----------|------|
|                                         |                                                | Inconclusive  | Moderate | High |
| Shoulder Girdle Pain/<br>Dysfunction    | Manipulation/<br>mobilization                  |               | positive |      |
| Rotator Cuff Pain                       | Manipulation/<br>mobilization                  | favorable     |          |      |
| Shoulder Pain                           | Massage                                        | favorable     |          |      |
| Adhesive Capsulitis                     | High-grade<br>mobilization                     |               | positive |      |
| Tennis Elbow (Lateral<br>Epicondylitis) | Manipulation                                   | non-favorable |          |      |
| Tennis Elbow (Lateral<br>Epicondylitis) | Manual tender<br>point therapy                 | favorable     |          |      |
| Tennis Elbow (Lateral<br>Epicondylitis) | Mobilization with<br>exercise                  |               | positive |      |
| Carpal Tunnel<br>Syndrome               | Manipulation/<br>mobilization                  | favorable     |          |      |
| Hip Osteoarthritis                      | Manipulation/<br>mobilization                  |               | positive |      |
| Hip Arthroplasty<br>Rehabilitation      | Osteopathic<br>manipulative<br>therapy (OMT)   | non-favorable |          |      |
| Knee Osteoarthritis                     | Manipulation/<br>mobilization with<br>exercise |               | positive |      |
| Patellofemoral Pain<br>Syndrome         | Manipulation/<br>mobilization with<br>exercise |               | positive |      |
| Knee Arthroplasty<br>Rehabilitation     | OMT                                            | non-favorable |          |      |
| Knee Osteoarthritis                     | Massage                                        | favorable     |          |      |
| Ankle Sprains                           | Manipulation/<br>mobilization                  | favorable     |          |      |
| Ankle Fracture<br>Rehabilitation        | Mobilization                                   |               | negative |      |
| Plantar Fasciitis                       | Manipulation/<br>mobilization with<br>exercise |               | positive |      |
| Morton's Neuroma                        | Manipulation/<br>mobilization                  | favorable     |          |      |
| Hallux Limitus                          | Manipulation/<br>mobilization                  | favorable     |          |      |
| Hallux Abducto<br>Valgus                | Manipulation/<br>mobilization                  | favorable     |          |      |
